# Supplementary material for: Insurance-Reimbursable Mindfulness for Safety-Net Primary Care Patients: a Pilot Randomized Controlled Trial
Source: Springer Nature journal article supplement (doi:10.1007/s12671-019-01116-8), 2019-03-18
Supplement: MOESM1 [file 16558664]

**SUPPLEMENTAL MATERIALS**

| **Supplementary Table 1**  **Chronic Medical Conditions at time of referral or 6 months prior** | | | |
| --- | --- | --- | --- |
|  | | | |
| **Condition** | **MTPC N(%)** | **LDC N(%)** | **Total N(%)** |
| Obesity | 11 (20) | 8 (30) | 19 (23.5) |
| Hypertension | 10 (19) | 4 (15) | 14 (17) |
| High Cholesterol | 9 (17) | 8 (30) | 17 (21) |
| Arthritis | 2 (4) | 1 (4) | 3 (4) |
| Coronary Heart Disease | 0 (0) | 1 (1) | 1 (1) |
| Chronic Kidney Disease | 1 (2) | 1 (4) | 2 (2) |
| Diabetes Type II | 3 (6) | 3 (11) | 6 (7) |
| Heart Failure | 0 (0) | 1 (4) | 1 (1) |
| COPD | 1 (2) | 0 (0) | 1 (1) |
| Cancer | 2 (4) | 1 (4) | 3 (4) |
| **TOTAL** | **39 (48)** | **26 (48)** | **13 (48)** |

*No differences were found between MTPC and LDC by χ2 test.*

**LIST OF COMMUNITY MINDFULNESS RESOURCES**

**Community Mindfulness Resources**

Thank you for participating in the Mindfulness Group Orientation session, sponsored by the CHA Center for Mindfulness and Compassion. We hope that these resources will help you bring continuity to your mindfulness practice in daily life.

***Definitions of Mindfulness***

The awareness that emerges through paying attention on purpose, and nonjudgmentally, to the unfolding of experience moment to moment. *Kabat-Zinn 2003*

Awareness of present experience with acceptance. *Germer 2013*

***Community and Practice***

**CHA Center for Mindfulness and Compassion**

CMC aims to enhance the health and well-being of CHA’s diverse community by integrating mindfulness and compassion into health care. CMC envisions a vibrant center that cultivates mindfulness and compassion in the following areas: patient care, clinician and staff well-being, professional education and training, our communities, and scientific research.

26 Central St, Somerville, MA 02143

[www.challiance.org/CMC](http://www.challiance.org/CMC)

**Mindful Boston**

Mindful Boston is a meditation practice studio located in Cambridge. It offers free community meditation sessions, as well as MBSR programs, and mindfulness workshops. In addition, Mindful Boston offers free online resources such as guided mindfulness meditations.

694 Massachusetts Avenue, Central Square, Cambridge MA 02139

http://mindfulboston.com/index.html

**The Arlington Center, Arlington, MA**

The Arlington Center offers classes, workshops and services in movement, meditation, and wellness.

369 Mass Ave, Arlington, MA

[www.arlingtoncenter.org](file:///\\mpd\epine$\www.arlingtoncenter.org)

**Cambridge Insight Meditation Center**

The Cambridge Insight Meditation Center is a nonprofit, nonresidential urban center for the practice of Insight Meditation. Located in the heart of Cambridge, CIMC provides an environment where the contemplative life can be developed and protected amid the complexities of city living. Here, people of all religious, non-religious, and philosophical persuasions, can come together to learn, support and deepen practice.

331 Broadway, Cambridge, MA 01239

[www.cimc.info](file:///\\mpd\epine$\www.cimc.info%20)

**The Center for Mindfulness - University of Massachusetts Medical School**

The UMass Medical School Center for Mindfulness in Medicine, Health Care, and Society’s aims to explore, understand, articulate and further mindfulness in the lives of individuals, organizations and communities through clinical care, rigorous scientific research, professional training, and informed public discourse.

55 Lake Ave North, Worcester, MA 01655

<http://www.umassmed.edu/cfm/>

***Books***

The Mindful Way Workbook. John Teasdale, Mark Williams, Zindel Segal

The Mindful Way through Depression. Mark Williams, John Teasdale, Zindel Segal, Jon Kabat-Zinn

Full Catastrophe Living, 2nd Edition. Jon Kabat-Zinn

The Mindful Path to Self-Compassion. Chris Germer

The Mindfulness Solution. Ron Siegel

Sitting Together. Susan Pollak, Paul Fulton, Ron Siegel

***Guided Mindfulness Recordings***

All available online for free at:

1. **CHA Center for Mindfulness and Compassion**

Mindfulness Recordings and Resources

[www.chacmc.org/resources](http://www.chacmc.org/resources)

1. **UCLA Mindful Awareness Research Center**

Guided Mindfulness Practices

<http://marc.ucla.edu/body.cfm?id=22>

1. **UC San Diego Center for Mindfulness Website**

Guided Mindfulness Practices

<http://health.ucsd.edu/specialties/mindfulness/programs/mbsr/Pages/audio.aspx>

1. **Sitting Together Website**

Guided Mindfulness and Compassion Practices

<http://sittingtogether.com/meditations.php>

1. **Center for Mindful Self-Compassion Website**

Guided Compassion and Self-Compassion Practices

<http://www.centerformsc.org/meditations>

1. **Tara Brach Website**

Guided Practices

<http://www.tarabrach.com/audioarchives-guided-meditations.html>

***5 Most Popular Mindfulness Apps***

1. **Headspace**

Free app for iPhone and Android

<http://www.headspace.com/>

1. **Insight Timer**

Free app for iPhone and Android

<http://insighttimer.com/>

1. **Stop, Breathe & Think**

Free app for iPhone, Android, and Web

<http://stopbreathethink.org/>

1. **Omvana**

Free app for iPhone and Android

<http://www.omvana.com/>

1. **The Mindfulness Training App**

Free app for iPhone

<https://itunes.apple.com/us/app/themindfulness-training-app/id687853790?mt=8>
